# Supplementary material for: A Prediction Model of Essential Hypertension Based on Genetic and Environmental Risk Factors in Northern Han Chinese
Source: PubMed Central journal article supplement — Int J Med Sci. 2019 Jun 2;16(6):793–9. doi: 10.7150/ijms.33967 (PMC6643104; doi:10.7150/ijms.33967), 2019-06-02
Supplement: ijmsv16p0793s1.pdf [file ijmsv16p0793s1.pdf]

**Table 1. Basic Information of 102 included SNPs**

| Source          | SNP        | CHR                     | Gene                     | Functional Consequence               |
|-----------------|------------|-------------------------|--------------------------|--------------------------------------|
| <b>GWAS</b>     | rs17030613 | 1                       | CAPZA1                   | intron variant                       |
|                 | rs16849225 | 2                       | FIGN/GRB14 (nearby gene) | N/A                                  |
|                 | rs6825911  | 4                       | ENPEP (nearby gene)      | N/A                                  |
|                 | rs1173766  | 5                       | NPR3 (nearby gene)       | N/A                                  |
|                 | rs11066280 | 12                      | HECTD4                   | intron variant                       |
|                 | rs35444    | 12                      | TBX3                     | N/A                                  |
|                 | rs880315   | 1                       | CASZ1                    | intron variant                       |
|                 | rs11191548 | 10                      | CNNM2                    | nc transcript variant                |
|                 | rs17249754 | 12                      | ATP2B1                   | intron variant                       |
|                 | rs9810888  | 3                       | CACNA1D                  | intron variant                       |
|                 | rs11067763 | 12                      | LOC105370003             | intron variant                       |
|                 | rs820430   | 3                       | SLC4A7 (nearby gene)     | N/A                                  |
|                 | rs1902859  | 4                       | FGF5 (nearby gene)       | N/A                                  |
|                 | rs4409766  | 10                      | BORCS7-ASMT              | intron variant                       |
|                 | rs4757391  | 11                      | SOX6                     | intron variant                       |
|                 | rs1887320  | 20                      | C20orf187                | intron variant, upstream variant 2KB |
|                 | rs13143871 | 4                       | GUCY1A3                  | intron variant                       |
| rs1991391       | 12         | TBX3-TBX5 (nearby gene) | N/A                      |                                      |
| <b>Tag SNPs</b> | rs1042713  | 5                       | ADRB2                    | missense                             |
|                 | rs1042714  | 5                       | ADRB2                    | missense                             |
|                 | rs1042717  | 5                       | ADRB2                    | synonymous codon                     |
|                 | rs1042719  | 5                       | ADRB2                    | synonymous codon                     |
|                 | rs4994     | 8                       | ADRB3                    | missense                             |
|                 | rs11240688 | 1                       | REN                      | intron variant                       |
|                 | rs6693954  | 1                       | REN                      | intron variant                       |
|                 | rs1464816  | 1                       | REN                      | intron variant                       |
|                 | rs11571078 | 1                       | REN                      | intron variant                       |
|                 | rs11122575 | 1                       | AGT                      | intron variant                       |
|                 | rs699      | 1                       | AGT                      | missense                             |
|                 | rs2478545  | 1                       | AGT                      | intron variant                       |
|                 | rs3827750  | 1                       | AGT                      | intron variant                       |
|                 | rs5050     | 1                       | AGT                      | utr variant 5 prime                  |
|                 | rs3789671  | 1                       | AGT                      | intron variant                       |
|                 | rs7539020  | 1                       | AGT                      | intron variant                       |
|                 | rs2478523  | 1                       | AGT                      | intron variant                       |
|                 | rs2493132  | 1                       | AGT                      | intron variant                       |
|                 | rs4762     | 1                       | AGT                      | missense                             |
|                 | rs3889728  | 1                       | AGT                      | intron variant                       |
|                 | rs11568023 | 1                       | AGT                      | intron variant                       |
|                 | rs7079     | 1                       | AGT                      | utr variant 3 prime                  |
|                 | rs4344     | 17                      | ACE                      | intron variant                       |
|                 | rs4461142  | 17                      | N/A                      | N/A                                  |
|                 | rs11658531 | 17                      | N/A                      | N/A                                  |
| rs4340          | 17         | N/A                     | of 287 bp in intron 16   |                                      |

|            |    |         |                                            |
|------------|----|---------|--------------------------------------------|
| rs2074192  | X  | ACE2    | intron variant                             |
| rs6632677  | X  | ACE2    | intron variant                             |
| rs2106809  | X  | ACE2    | intron variant                             |
| rs5194     | X  | AGTR2   | utr variant 3 prime                        |
| rs3736556  | X  | AGTR2   | intron variant                             |
| rs5193     | X  | AGTR2   | utr variant 3 prime                        |
| rs1492100  | 3  | AGTR1   | intron variant                             |
| rs2638360  | 3  | AGTR1   | intron variant                             |
| rs2131127  | 3  | AGTR1   | intron variant                             |
| rs1800766  | 3  | AGTR1   | intron variant, utr variant 5 prime        |
| rs5182     | 3  | AGTR1   | synonymous codon                           |
| rs275649   | 3  | AGTR1   | intron variant                             |
| rs6801836  | 3  | AGTR1   | intron variant                             |
| rs3772616  | 3  | AGTR1   | intron variant                             |
| rs5186     | 3  | AGTR1   | utr variant 3 prime                        |
| rs388915   | 3  | AGTR1   | intron variant, upstream variant 2KB       |
| rs6433     | 8  | CYP11B2 | intron variant                             |
| rs3802228  | 8  | CYP11B2 | utr variant 3 prime                        |
| rs1799998  | 8  | CYP11B2 | upstream variant 2KB                       |
| rs2336384  | 1  | Mfn2    | intron variant                             |
| rs2295281  | 1  | Mfn2    | intron variant                             |
| rs17037564 | 1  | Mfn2    | intron variant                             |
| rs2236057  | 1  | Mfn2    | intron variant                             |
| rs2236058  | 1  | Mfn2    | intron variant                             |
| rs3766741  | 1  | Mfn2    | intron variant                             |
| rs3820189  | 1  | Mfn2    | upstream variant 2KB                       |
| rs3753579  | 1  | Mfn2    | upstream variant 2KB                       |
| rs11608756 | 12 | WNK1    | intron variant                             |
| rs4980974  | 12 | WNK1    | intron variant                             |
| rs956868   | 12 | WNK1    | missense                                   |
| rs7972490  | 12 | WNK1    | intron variant                             |
| rs880054   | 12 | WNK1    | intron variant                             |
| rs10774457 | 12 | WNK1    | intron variant                             |
| rs11064524 | 12 | WNK1    | intron variant                             |
| rs4980973  | 12 | WNK1    | intron variant                             |
| rs11611231 | 12 | WNK1    | intron variant, missense, synonymous codon |
| rs10849558 | 12 | WNK1    | intron variant                             |
| rs2051852  | 12 | WNK1    | intron variant                             |
| rs7305099  | 12 | WNK1    | intron variant                             |
| rs10774461 | 12 | WNK1    | intron variant                             |
| rs12828016 | 12 | WNK1    | missense                                   |
| rs5370     | 6  | EDN1    | missense                                   |
| rs1630736  | 6  | EDN1    | intron variant                             |
| rs212544   | 1  | ECE1    | intron variant, upstream variant 2KB       |
| rs2076280  | 1  | ECE1    | intron variant                             |
| rs115071   | 1  | ECE1    | intron variant                             |
| rs2076283  | 1  | ECE1    | intron variant                             |
| rs9426748  | 1  | ECE1    | intron variant                             |

|                                    |             |    |         |                |
|------------------------------------|-------------|----|---------|----------------|
|                                    | rs11590928  | 1  | ECE1    | intron variant |
|                                    | rs212515    | 1  | ECE1    | intron variant |
|                                    | rs2236847   | 1  | ECE1    | intron variant |
|                                    | rs2282715   | 1  | ECE1    | intron variant |
|                                    | rs2774028   | 1  | ECE1    | intron variant |
| <b>Low-coverage<br/>Sequencing</b> | rs149482097 | 16 | CDH13   | intron variant |
|                                    | rs4838825   | 22 | MOV10L1 | intron variant |
|                                    | rs10088365  | 8  | MSRA    | intron variant |
|                                    | rs35857376  | 10 | PLCE1   | intron variant |
|                                    | rs35402582  | 20 | ZNF831  | intron variant |

SNP: single nucleotide polymorphism; CHR: chromosome; GWAS, genome-wide association study.
